# Supplementary material for: Acute effects of muscle mechanical properties after 2000-m rowing in young male rowers
Source: PeerJ. 2024 Jan 4;12:e16737. doi: 10.7717/peerj.16737 (PMC10771759; doi:10.7717/peerj.16737)
Supplement: Supplemental Information 1 — All body composition, muscle tone (frequency), and stiffness. These data were used for statistical analysis to compare muscle tone (frequency) and stiffness of the dominant and non-dominant at pre- and post-rowing time-trial. [file peerj-12-16737-s001.xlsx]

## Sheet: Body composition (Inbody) data
	Age (years)	Height (cm)	Body weight (kg)	BMI (kg/m^2)	Skeletal muscle mass (kg)	body fat percentage (%)	Rowing experience (years)
S1	17	175	63	20.6	33.8	6.5	5
S2	18	158	55.5	22.2	25.8	17	7
S3	18	171	74.7	22.1	32.9	10.2	7
S4	18	174	83.4	27.5	37.5	21.4	6
S5	18	169	77.4	27.1	35	20.4	5
S6	16	176	87.1	28.1	38.2	22.5	5
S7	17	171	63.6	21.8	32	11.7	5
S8	16	176	66	21.3	33.3	10.6	5
S9	17	170	76.3	26.4	32.2	25.4	5
S10	18	180	74.8	23.1	41	5.4	7
S11	16	173	75.1	25.1	32.8	23.2	6
S12	16	169	85.2	29.8	36.9	24.8	5

## Sheet: Posterior deltoid
Posterior deltoid
Non-dominant					Dominant
	Pre-test					Pre-test
		Frequency	Stiffness				Frequency	Stiffness
	S1	12.27	149.33			S1	12.63	160.67
	S2	12	139.67			S2	12.93	142.33
	S3	12.63	140.7			S3	12.533	151.4
	S4	12.67	178			S4	12.23	171
	S5	12.47	167.33			S5	11.7	153
	S6	12.3	150			S6	12.2	148.6
	S7	12.97	173.33			S7	12.6	147.33
	S8	12.8	155.33			S8	12.27	150
	S9	14.87	205.4			S9	15.13	210.3
	S10	15.77	208.67			S10	15.2	201.67
	S11	12.1	150			S11	13.2	186
	S12	11.6	157.7			S12	12.1	160
	Post-test					Post-test
		Frequency	Stiffness				Frequency	Stiffness
	S1	12.4	154.1			S1	13.77	184.33
	S2	12.8	141.67			S2	13.23	179.33
	S3	13.7	160.33			S3	12.9	172.67
	S4	12.03	188.2			S4	14.27	185.33
	S5	11.9	171.67			S5	12.83	176.23
	S6	11.4	159.7			S6	13.97	169.57
	S7	13.57	180.67			S7	12.97	166.77
	S8	13.2	158.33			S8	13.7	177.33
	S9	14.1	230.4			S9	15.9	229.4
	S10	14.93	215.9			S10	15.73	233.2
	S11	13.6	168.7			S11	13.5	213.81
	S12	12.7	166.3			S12	13.3	187.3

## Sheet: Latissimus dorsi
Latissimus dorsi
Non-dominant					Dominant
	Pre-test					Pre-test
		Frequency	Stiffness				Frequency	Stiffness
	S1	14.17	207.33			S1	13.43	214
	S2	11.8	154.67			S2	11.07	179.67
	S3	14.23	211.9			S3	14.1	218.33
	S4	11.47	167			S4	11.87	180
	S5	12.9	208.67			S5	12.9	215.67
	S6	13.47	179			S6	12.23	183.67
	S7	13.63	211.67			S7	13.27	207
	S8	13.27	192.67			S8	13.8	214
	S9	13.1	185.67			S9	14.2	196.4
	S10	14.833	222.67			S10	15.07	223.33
	S11	12.9	186			S11	13.5	210
	S12	11.9	177			S12	12.4	176.4
	Post-test					Post-test
		Frequency	Stiffness				Frequency	Stiffness
	S1	13.8	230.67			S1	13.83	218.33
	S2	12.07	175.52			S2	12.77	188.2
	S3	15.27	226.64			S3	16.8	240.6
	S4	13.2	202.33			S4	12.67	193.67
	S5	13.73	219.93			S5	14	227.33
	S6	14.13	197.67			S6	13.4	196.33
	S7	14.83	221.2			S7	14.43	223.67
	S8	14.33	207			S8	14.27	223.73
	S9	13.33	193.97			S9	15.87	240.67
	S10	13.9	233.67			S10	15.73	252.67
	S11	13.5	210			S11	14.3	234
	S12	12.7	192.7			S12	13.5	186.9

## Sheet: Rectus femoris
Rectus femoris
Non-dominant					Dominant
	Pre-test					Pre-test
		Frequency	Stiffness				Frequency	Stiffness
	S1	16.4	297.33			S1	18.03	328
	S2	15.43	285.33			S2	16.8	276.67
	S3	17.4	290			S3	16.67	298.67
	S4	14.83	264.67			S4	15.5	281
	S5	13.23	219.33			S5	14.63	238.67
	S6	15.73	267			S6	14.37	228.33
	S7	17.73	296.33			S7	16.9	292
	S8	16.87	292			S8	15.23	271.67
	S9	16.87	279			S9	13.97	237
	S10	16.8	276.67			S10	17.73	295.67
	S11	15.1	262			S11	16.3	302
	S12	15.5	272			S12	15.3	288
	Post-test					Post-test
		Frequency	Stiffness				Frequency	Stiffness
	S1	17.63	311.33			S1	19.27	357.33
	S2	15.9	298.33			S2	17.47	306.67
	S3	18.83	327.67			S3	18.07	319
	S4	15.37	271.33			S4	17.67	312
	S5	15.57	261.33			S5	14.73	261.67
	S6	15.9	274			S6	16.47	296.33
	S7	19.17	329.67			S7	18.17	324.33
	S8	16.67	318			S8	19.33	346
	S9	16.23	283.33			S9	16.13	270
	S10	16.37	289			S10	17.5	308.11
	S11	16.2	277			S11	17.5	309
	S12	17.1	293			S12	18.9	329.25
